# Supplementary material
Source: publisher figshare collection journal article supplement (https://geolsoc.figshare.com/articles/dataset/_/3454346)
Supplement: Supplementary file 1 [file 1]

# Geological Society Supplementary Publication No. SUP18244

**Parent Paper:** **Subglacial bedrock welding associated with glacial earthquakes**

BESTMANN, M., RICE, A. H. N., LANGENHORST, F., GRASEMANN, B. & HEIDELBACH, F.

Appearing in Journal of the Geological Society, Vol. 163, Part 3, May 2006, pp. 417-420.

Supplementary material:

1. Subglacial bedrock welding associated with ice quakes (.rtf; 63kb).
2. SEM-CL micrograph of deformed sandstone microstructure directly under striated surface F1 (.jpg; 75kb).
3. Analysed microstructure of deformed sandstone immediately under the polished surface F2 (.jpg; 111kb).
4. Examples of internal substructures of deformed grains F3 (.jpg; 99kb).
5. Transmission electron microscope micrograph F4 (.jpg; 33kb).
